# Supplementary material for: Trends in the antimicrobial susceptibility among Chinese neonates from 2012 to 2021: a multicenter study
Source: PubMed Central journal article supplement (PMC11290293; doi:10.1186/s13756-024-01440-2), 2024-07-30
Supplement: 13756_2024_1440_MOESM1_ESM.pdf [file 13756_2024_1440_MOESM1_ESM.pdf]

## **Additional file 1**

*Table: Participating hospitals in this study*

| Province/municipality | Participating hospitals                                                                                                                                                                                                                                 |
|-----------------------|---------------------------------------------------------------------------------------------------------------------------------------------------------------------------------------------------------------------------------------------------------|
| Shanghai              | Xinhua Hospital<br>Children's Hospital of Shanghai<br>Shanghai Children's Medical Center<br>Children's Hospital of Fudan University<br>Obstetrics & Gynecology Hospital of Fudan University<br>International Peace Maternity and Child Health Hospital  |
| Jiangsu Province      | Children's Hospital of Nanjing Medical University<br>Affiliated Women's Hospital of Jiangnan University<br>Changzhou Maternal and Child Health Care Hospital<br>Affiliated Hospital of Jiangsu University<br>Affiliated Hospital of Yangzhou University |
| Zhejiang Province     | Jiaxing University Affiliated Women and Children Hospital                                                                                                                                                                                               |
| Henan Province        | First Affiliated Hospital of Zhengzhou University                                                                                                                                                                                                       |
| Shandong Province     | The Affiliated Hospital of Qingdao University                                                                                                                                                                                                           |
| Guangdong Province    | Dongguan Children's Hospital Affiliated to Guangdong Medical University                                                                                                                                                                                 |
| Sichuan Province      | The Affiliated Hospital of Southwest Medical University                                                                                                                                                                                                 |
| Liaoning Province     | Shengjing Hospital of China Medical University                                                                                                                                                                                                          |
