# Supplementary material for: Trends in the antimicrobial susceptibility among Chinese neonates from 2012 to 2021: a multicenter study
Source: PubMed Central journal article supplement (PMC11290293; doi:10.1186/s13756-024-01440-2), 2024-07-30
Supplement: 13756_2024_1440_MOESM2_ESM.pdf [file 13756_2024_1440_MOESM2_ESM.pdf]

## Additional file 2

Table: Trends in the antimicrobial susceptibility of common pathogens among Chinese full-term neonates with IBIs

|                                    | Annual susceptible strains, % (95% CI) |                                   |                                   |                         |                         |                         |                                   |                         |                                   |                                   | P value for trend <sup>b</sup> |
|------------------------------------|----------------------------------------|-----------------------------------|-----------------------------------|-------------------------|-------------------------|-------------------------|-----------------------------------|-------------------------|-----------------------------------|-----------------------------------|--------------------------------|
|                                    | 2012                                   | 2013                              | 2014                              | 2015                    | 2016                    | 2017                    | 2018                              | 2019                    | 2020                              | 2021                              |                                |
| E. coli                            | n=14                                   | n=19                              | n=19                              | n=33                    | n=35                    | n=14                    | n=17                              | n=26                    | n=25                              | n=17                              |                                |
| Ampicillin                         | 14.3<br>(7.5, 21.1)                    | 47.4<br>(39.3, 55.5)              | 33.3<br>(25.4, 41.2) <sup>a</sup> | 18.2<br>(13.3, 23.1)    | 28.6<br>(23.4, 33.8)    | 21.5<br>(13.6, 29.4)    | 15.4<br>(9.3, 21.5) <sup>a</sup>  | 11.5<br>(7.3, 15.7)     | 37.5<br>(30.7, 44.3) <sup>a</sup> | 7.1<br>(3.2, 11.0) <sup>a</sup>   | 0.20                           |
| Cefepime                           | 85.7<br>(78.8, 92.6)                   | 92.3<br>(87.1, 97.5) <sup>a</sup> | 89.5<br>(84.4, 94.6)              | 66.7<br>(60.5, 72.9)    | 82.9<br>(78.6, 87.2)    | 42.9<br>(34.1, 51.7)    | 76.5<br>(69.4, 83.6)              | 80.8<br>(76.6, 85.0)    | 84.0<br>(78.9, 89.1)              | 64.7<br>(57.8, 71.6)              | 0.26                           |
| Gentamicin                         | 50.0<br>(41.2, 58.8)                   | 84.2<br>(78.1, 90.3)              | 33.3<br>(25.4, 41.2) <sup>a</sup> | 54.5<br>(48.6, 60.4)    | 74.3<br>(69.1, 79.5)    | 64.3<br>(55.4, 73.2)    | 50.0<br>(42.1, 57.9) <sup>a</sup> | 84.6<br>(79.5, 89.7)    | 81.0<br>(75.1, 86.9) <sup>a</sup> | 66.7<br>(58.9, 74.5) <sup>a</sup> | 0.63                           |
| Cefotaxime                         | 38.4<br>(29.6, 47.2) <sup>a</sup>      | 63.2<br>(55.1, 71.3)              | 63.2<br>(55.1, 71.3)              | 81.8<br>(76.7, 86.9)    | 74.3<br>(69.4, 79.2)    | 28.6<br>(19.7, 37.5)    | 64.7<br>(56.5, 72.9)              | 73.1<br>(67.2, 79.0)    | 72.0<br>(66.2, 77.8)              | 58.8<br>(50.7, 66.9)              | 0.97                           |
| Ceftriaxone                        | 50.0<br>(41.1, 58.9)                   | 63.2<br>(55.1, 71.3)              | 73.7<br>(66.6, 80.8)              | 48.4<br>(42.5, 54.3)    | 82.9<br>(78.6, 87.2)    | 14.3<br>(7.1, 21.5)     | 66.7<br>(58.8, 74.6) <sup>a</sup> | 65.4<br>(60.3, 70.5)    | 76.0<br>(70.2, 81.8)              | 50.0<br>(42.1, 57.9) <sup>a</sup> | 0.99                           |
| Meropenem                          | 100.0<br>(100.0, 100.0)                | 100.0<br>(100.0, 100.0)           | 100.0<br>(100.0, 100.0)           | 100.0<br>(100.0, 100.0) | 100.0<br>(100.0, 100.0) | 100.0<br>(100.0, 100.0) | 100.0<br>(100.0, 100.0)           | 100.0<br>(100.0, 100.0) | 100.0<br>(100.0, 100.0)           | 100.0<br>(100.0, 100.0)           | NA                             |
| ESBL-negative strains <sup>c</sup> | 0.0<br>(0.0, 0.0) <sup>a</sup>         | 6.7<br>(1.8, 11.6) <sup>a</sup>   | 10.5<br>(5.4, 15.6)               | 27.2<br>(22.0, 32.4)    | 37.2<br>(31.3, 43.1)    | 42.9<br>(34.1, 51.7)    | 78.5<br>(71.4, 85.6) <sup>a</sup> | 88.5<br>(84.3, 92.7)    | 80.0<br>(74.2, 85.8)              | 76.5<br>(69.6, 83.4)              | <0.001 <sup>d</sup>            |

Table: Trends in the antimicrobial susceptibility of common pathogens among Chinese full-term neonates with IBIs (continued)

|              | Annual susceptible strains, % (95% CI) |                |                           |                           |                |                |                |                           |                           |                           | P value for trend <sup>b</sup> |
|--------------|----------------------------------------|----------------|---------------------------|---------------------------|----------------|----------------|----------------|---------------------------|---------------------------|---------------------------|--------------------------------|
|              | 2012                                   | 2013           | 2014                      | 2015                      | 2016           | 2017           | 2018           | 2019                      | 2020                      | 2021                      |                                |
| GBS          | n=11                                   | n=10           | n=23                      | n=20                      | n=37           | n=20           | n=20           | n=17                      | n=6                       | n=9                       |                                |
| Erythromycin | 0.0                                    | 0.0            | 21.7                      | 0.0                       | 32.4           | 50.0           | 25.0           | 23.5                      | 33.3                      | 66.7                      | 0.002 <sup>d</sup>             |
|              | (0.0, 0.0)                             | (0.0, 0.0)     | (15.8, 27.6)              | (0.0, 0.0)                | (27.3, 37.5)   | (42.2, 57.8)   | (17.9, 32.1)   | (16.6, 30.4)              | (26.5, 40.1)              | (61.6, 71.8)              |                                |
| Clindamycin  | 0.0                                    | 0.0            | 15.0                      | 8.3                       | 37.8           | 40.0           | 20.0           | 25.0                      | 25.0                      | 42.8                      | <0.001 <sup>d</sup>            |
|              | (0.0, 0.0)                             | (0.0, 0.0)     | (10.1, 19.9) <sup>a</sup> | (4.1, 12.5) <sup>a</sup>  | (32.7, 42.9)   | (32.2, 47.8)   | (13.9, 26.1)   | (18.1, 31.9) <sup>a</sup> | (18.8, 31.2) <sup>a</sup> | (37.7, 47.9) <sup>a</sup> |                                |
| Linezolid    | 100.0                                  | 100.0          | 100.0                     | 100.0                     | 100.0          | 100.0          | 100.0          | 100.0                     | 100.0                     | 100.0                     | NA                             |
|              | (100.0, 100.0)                         | (100.0, 100.0) | (100.0, 100.0)            | (100.0, 100.0)            | (100.0, 100.0) | (100.0, 100.0) | (100.0, 100.0) | (100.0, 100.0)            | (100.0, 100.0)            | (100.0, 100.0)            |                                |
| Ceftriaxone  | 100.0                                  | 100.0          | 91.3                      | 100.0                     | 100.0          | 100.0          | 100.0          | 100.0                     | 100.0                     | 100.0                     | 0.77                           |
|              | (100.0, 100.0)                         | (100.0, 100.0) | (87.9, 94.7)              | (100.0, 100.0)            | (100.0, 100.0) | (100.0, 100.0) | (100.0, 100.0) | (100.0, 100.0)            | (100.0, 100.0)            | (100.0, 100.0)            |                                |
| Vancomycin   | 100.0                                  | 100.0          | 100.0                     | 100.0                     | 100.0          | 100.0          | 100.0          | 100.0                     | 100.0                     | 100.0                     | NA                             |
|              | (100.0, 100.0)                         | (100.0, 100.0) | (100.0, 100.0)            | (100.0, 100.0)            | (100.0, 100.0) | (100.0, 100.0) | (100.0, 100.0) | (100.0, 100.0)            | (100.0, 100.0)            | (100.0, 100.0)            |                                |
| E. Spp.      | n=12                                   | n=10           | n=12                      | n=12                      | n=12           | n=9            | n=13           | n=10                      | n=8                       | n=25                      |                                |
| Ampicillin   | 100.0                                  | 50.0           | 50.0                      | 55.6                      | 66.7           | 44.4           | 30.7           | 44.4                      | 25.0                      | 40.0                      | <0.001 <sup>d</sup>            |
|              | (100.0, 100.0) <sup>a</sup>            | (38.8, 61.2)   | (39.8, 60.2)              | (45.7, 65.5) <sup>a</sup> | (57.1, 76.3)   | (34.6, 54.2)   | (22.8, 38.6)   | (35.5, 53.3) <sup>a</sup> | (15.9, 34.1)              | (33.8, 46.2)              |                                |
| Linezolid    | 100.0                                  | 100.0          | 100.0                     | 100.0                     | 100.0          | 100.0          | 100.0          | 100.0                     | 100.0                     | 100.0                     | NA                             |
|              | (100.0, 100.0)                         | (100.0, 100.0) | (100.0, 100.0)            | (100.0, 100.0)            | (100.0, 100.0) | (100.0, 100.0) | (100.0, 100.0) | (100.0, 100.0)            | (100.0, 100.0)            | (100.0, 100.0)            |                                |

Table: Trends in the antimicrobial susceptibility of common pathogens among Chinese full-term neonates with IBIs (continued)

|                               | Annual susceptible strains, % (95% CI) |                                |                                      |                                      |                                   |                                   |                                   |                                   |                                      |                                   | P value for trend <sup>b</sup> |
|-------------------------------|----------------------------------------|--------------------------------|--------------------------------------|--------------------------------------|-----------------------------------|-----------------------------------|-----------------------------------|-----------------------------------|--------------------------------------|-----------------------------------|--------------------------------|
|                               | 2012                                   | 2013                           | 2014                                 | 2015                                 | 2016                              | 2017                              | 2018                              | 2019                              | 2020                                 | 2021                              |                                |
| E. Spp.                       | n=12                                   | n=10                           | n=12                                 | n=12                                 | n=12                              | n=9                               | n=13                              | n=10                              | n=8                                  | n=25                              |                                |
| Penicillin                    | 33.3<br>(23.7, 42.9)                   | 50.0<br>(38.8, 61.2)           | 50.0<br>(39.8, 60.2)                 | 33.3<br>(23.7, 42.9)                 | 50.0<br>(39.8, 60.2)              | 25.0<br>(16.9, 33.1) <sup>a</sup> | 38.5<br>(30.6, 46.4)              | 33.3<br>(24.4, 42.2) <sup>a</sup> | 25.0<br>(16.2, 33.8)                 | 40.0<br>(33.9, 46.1)              | 0.35                           |
| High-concentration gentamicin | 100.0<br>(100.0, 100.0) <sup>a</sup>   | 0.0<br>(0.0, 0.0)              | 0.0<br>(0.0, 0.0) <sup>a</sup>       | 62.5<br>(53.6, 71.4) <sup>a</sup>    | 62.5<br>(53.6, 71.4) <sup>a</sup> | 100.0<br>(100.0, 100.0)           | 80.0<br>(72.9, 87.1) <sup>a</sup> | 80.0<br>(72.9, 87.1)              | 100.0<br>(100.0, 100.0)              | 100.0<br>(100.0, 100.0)           | 0.82                           |
| Vancomycin                    | 100.0<br>(100.0, 100.0)                | 100.0<br>(100.0, 100.0)        | 100.0<br>(100.0, 100.0)              | 100.0<br>(100.0, 100.0)              | 100.0<br>(100.0, 100.0)           | 100.0<br>(100.0, 100.0)           | 100.0<br>(100.0, 100.0)           | 100.0<br>(100.0, 100.0)           | 100.0<br>(100.0, 100.0)              | 100.0<br>(100.0, 100.0)           | NA                             |
| S. aureus                     | n=10                                   | n=11                           | n=10                                 | n=9                                  | n=10                              | n=12                              | n=12                              | n=14                              | n=14                                 | n=15                              |                                |
| Clindamycin                   | 0.0<br>(0.0, 0.0)                      | 0.0<br>(0.0, 0.0) <sup>a</sup> | 100.0<br>(100.0, 100.0) <sup>a</sup> | 100.0<br>(100.0, 100.0) <sup>a</sup> | 70.0<br>(62.2, 77.8)              | 50.0<br>(39.8, 60.2)              | 0.0<br>(0.0, 0.0) <sup>a</sup>    | 85.7<br>(79.6, 91.8)              | 100.0<br>(100.0, 100.0) <sup>a</sup> | 66.7<br>(59.8, 73.6)              | 0.88                           |
| Linezolid                     | 100.0<br>(100.0, 100.0)                | 100.0<br>(100.0, 100.0)        | 100.0<br>(100.0, 100.0)              | 100.0<br>(100.0, 100.0)              | 100.0<br>(100.0, 100.0)           | 100.0<br>(100.0, 100.0)           | 100.0<br>(100.0, 100.0)           | 100.0<br>(100.0, 100.0)           | 100.0<br>(100.0, 100.0)              | 100.0<br>(100.0, 100.0)           | NA                             |
| Vancomycin                    | 100.0<br>(100.0, 100.0)                | 100.0<br>(100.0, 100.0)        | 100.0<br>(100.0, 100.0)              | 100.0<br>(100.0, 100.0)              | 100.0<br>(100.0, 100.0)           | 100.0<br>(100.0, 100.0)           | 100.0<br>(100.0, 100.0)           | 100.0<br>(100.0, 100.0)           | 100.0<br>(100.0, 100.0)              | 100.0<br>(100.0, 100.0)           | NA                             |
| Penicillin                    | 0.0<br>(0.0, 0.0)                      | 0.0<br>(0.0, 0.0) <sup>a</sup> | 0.0<br>(0.0, 0.0)                    | 0.0<br>(0.0, 0.0)                    | 0.0<br>(0.0, 0.0)                 | 0.0<br>(0.0, 0.0) <sup>a</sup>    | 0.0<br>(0.0, 0.0)                 | 16.7<br>(10.6, 22.8) <sup>a</sup> | 7.1<br>(3.0, 11.2)                   | 50.0<br>(42.1, 57.9) <sup>a</sup> | <0.001 <sup>d</sup>            |

Table: Trends in the antimicrobial susceptibility of common pathogens among Chinese full-term neonates with IBIs (continued)

|            | Annual susceptible strains, % (95% CI) |         |                     |         |         |        |                    |         |                    |                    | P value for trend <sup>b</sup> |
|------------|----------------------------------------|---------|---------------------|---------|---------|--------|--------------------|---------|--------------------|--------------------|--------------------------------|
|            | 2012                                   | 2013    | 2014                | 2015    | 2016    | 2017   | 2018               | 2019    | 2020               | 2021               |                                |
| S. aureus  | n=10                                   | n=11    | n=10                | n=9     | n=10    | n=12   | n=12               | n=14    | n=14               | n=15               |                                |
| Gentamicin | 100.0                                  | 100.0   | 100.0               | 100.0   | 100.0   | 66.7   | 100.0              | 100.0   | 100.0              | 92.9               |                                |
|            | (100.0,                                | (100.0, | (100.0,             | (100.0, | (100.0, | (57.1, | (100.0,            | (100.0, | (100.0,            | (85.9,             | 0.87                           |
|            | 100.0)                                 | 100.0)  | 100.0)              | 100.0)  | 100.0)  | 76.3)  | 100.0)             | 100.0)  | 100.0)             | 99.9) <sup>a</sup> |                                |
| Oxacillin  | 90.0                                   | 90.9    | 100.0               | 88.9    | 90.0    | 91.7   | 90.9               | 85.7    | 90.9               | 92.9               | 0.10                           |
|            | (83.3,                                 | (84.8,  | (100.0,             | (81.5,  | (83.3,  | (86.0, | (84.8,             | (79.6,  | (84.8,             | (85.9,             |                                |
|            | 96.7)                                  | 97.0)   | 100.0) <sup>a</sup> | 96.3)   | 96.7)   | 97.3)  | 97.0) <sup>a</sup> | 91.8)   | 97.0) <sup>a</sup> | 99.9) <sup>a</sup> |                                |

Abbreviations: CI, confidence interval; E. coli, Escherichia coli; ESBL, extended-spectrum beta-lactamase; GBS, Group B Streptococcus; E. spp., Enterococcus spp.; S. aureus, Staphylococcus aureus; NA, not available

<sup>a</sup> Our antibiotic susceptibility rate was limited to strains with available drug susceptibility results, as a minority of strains lacked comprehensive susceptibility data for each antibiotic.

<sup>b</sup> The P value of average annual percentage change was calculated using the Joinpoint regression technique.

<sup>c</sup> Proportion of ESBL-negative E. coli strains.

<sup>d</sup> P < 0.05.
