# Supplementary material for: Trends in the antimicrobial susceptibility among Chinese neonates from 2012 to 2021: a multicenter study
Source: PubMed Central journal article supplement (PMC11290293; doi:10.1186/s13756-024-01440-2), 2024-07-30
Supplement: 13756_2024_1440_MOESM3_ESM.pdf [file 13756_2024_1440_MOESM3_ESM.pdf]

### Additional file 3

Table: Detailed model outputs of Joinpoint regression

| Antimicrobial susceptibility                | Periods (year) | APC (95% CI)        | $\beta$ | t      | P                   | AAPC (95% CI)       | $\beta$ | t/Z <sup>a</sup> | P                   |
|---------------------------------------------|----------------|---------------------|---------|--------|---------------------|---------------------|---------|------------------|---------------------|
| E. coli to ampicillin                       | 2012-2021      | -7.5 (-18.7, 5.3)   | -0.08   | -1.39  | 0.20                | -7.5 (-18.7, 5.3)   | -0.08   | -1.39            | 0.20                |
| E. coli to cefepime                         | 2012-2021      | -1.6 (-4.6, 1.5)    | -0.02   | -1.21  | 0.26                | -1.6 (-4.6, 1.5)    | -0.02   | -1.21            | 0.26                |
| E. coli to gentamicin                       | 2012-2021      | 1.2 (-4.3, 7.0)     | 0.01    | 0.50   | 0.63                | 1.2 (-4.3, 7.0)     | 0.01    | 0.50             | 0.63                |
| E. coli to cefotaxime                       | 2012-2021      | 0.1 (-4.7, 5.1)     | 0.0007  | 0.04   | 0.97                | 0.1 (-4.7, 5.1)     | 0.0007  | 0.04             | 0.97                |
| E. coli to ceftriaxone                      | 2012-2021      | 0.04 (-6.5, 7.0)    | 0.0004  | 0.01   | 0.99                | 0.04 (-6.5, 7.0)    | 0.0004  | 0.01             | 0.99                |
| E. coli to meropenem                        | 2012-2021      | 0.0 (-0.0, 0.0)     | 0.00    | NA     | NA                  | 0.0 (-0.0, 0.0)     | 0.00    | NA               | NA                  |
| ESBL-negative E. coli strains <sup>b</sup>  | 2012-2014      | 281.3 (34.6, 980.2) | 1.34    | 5.53   | 0.03 <sup>c</sup>   | 62.4 (44.3, 82.9)   | 0.41    | 8.00             | <0.001 <sup>c</sup> |
|                                             | 2014-2018      | 53.7 (18.4, 99.5)   | 0.43    | 7.09   | 0.02 <sup>c</sup>   |                     |         |                  |                     |
|                                             | 2018-2021      | -1.0 (-9.2, 8.0)    | -0.01   | -0.48  | 0.68                |                     |         |                  |                     |
| GBS to erythromycin                         | 2012-2021      | 55.2 (23.2, 95.5)   | 0.44    | 4.39   | 0.002 <sup>c</sup>  | 55.2 (23.2, 95.5)   | 0.44    | 4.39             | 0.002 <sup>c</sup>  |
| GBS to clindamycin                          | 2012-2016      | 161.0 (4.3, 553.2)  | 0.96    | 2.69   | 0.04 <sup>c</sup>   | 54.8 (9.6, 118.6)   | 0.39    | 2.50             | <0.001 <sup>c</sup> |
|                                             | 2016-2021      | 1.9 (-28.5, 45.4)   | 0.02    | 0.14   | 0.90                |                     |         |                  |                     |
| GBS to linezolid                            | 2012-2021      | 0.0 (-0.0, 0.0)     | 0.00    | NA     | NA                  | 0.0 (-0.0, 0.0)     | 0.00    | NA               | NA                  |
| GBS to ceftriaxone                          | 2012-2021      | 0.0 (-0.2, 0.3)     | 0.0003  | 0.30   | 0.77                | 0.0 (-0.2, 0.3)     | 0.0003  | 0.30             | 0.77                |
| GBS to vancomycin                           | 2012-2021      | 0.0 (-0.0, 0.0)     | 0.00    | NA     | NA                  | 0.0 (-0.0, 0.0)     | 0.00    | NA               | NA                  |
| E. spp. to ampicillin                       | 2012-2021      | -11.7 (-15.2, -8.1) | -0.12   | -7.16  | <0.001 <sup>c</sup> | -11.7 (-15.2, -8.1) | -0.12   | -7.16            | <0.001 <sup>c</sup> |
| E. spp. to linezolid                        | 2012-2021      | 0.0 (-0.0, 0.0)     | 0.00    | NA     | NA                  | 0.0 (-0.0, 0.0)     | 0.00    | NA               | NA                  |
| E. spp. to penicillin                       | 2012-2021      | -2.3 (-7.6, 3.2)    | -0.02   | -0.997 | 0.35                | -2.3 (-7.6, 3.2)    | -0.02   | -0.997           | 0.35                |
| E. spp. to high-concentration<br>gentamicin | 2012-2021      | 0.8 (-6.6, 8.7)     | 0.01    | 0.23   | 0.82                | 0.8 (-6.6, 8.7)     | 0.01    | 0.23             | 0.82                |
|                                             | 2012-2021      | 0.0 (-0.0, 0.0)     | 0.00    | NA     | NA                  | 0.0 (-0.0, 0.0)     | 0.00    | NA               | NA                  |
| S. aureus to clindamycin                    | 2012-2021      | 0.9 (-12.1, 15.9)   | 0.01    | 0.16   | 0.88                | 0.9 (-12.1, 15.9)   | 0.01    | 0.16             | 0.88                |

*Table: Detailed model outputs of Joinpoint regression (continued)*

| Antimicrobial susceptibility | Periods (year) | APC (95% CI)         | $\beta$ | t     | P                  | AAPC (95% CI)     | $\beta$ | t/Z <sup>a</sup> | P                   |
|------------------------------|----------------|----------------------|---------|-------|--------------------|-------------------|---------|------------------|---------------------|
| S. aureus to linezolid       | 2012-2021      | 0.0 (-0.0, 0.0)      | 0.00    | NA    | NA                 | 0.0 (-0.0, 0.0)   | 0.00    | NA               | NA                  |
| S. aureus to vancomycin      | 2012-2021      | 0.0 (-0.0, 0.0)      | 0.00    | NA    | NA                 | 0.0 (-0.0, 0.0)   | 0.00    | NA               | NA                  |
| S. aureus to penicillin      | 2012-2018      | 2.8 (-9.6, 17.0)     | 0.03    | 0.56  | 0.60               | 56.2 (34.8, 81.0) | 0.41    | 5.90             | <0.001 <sup>c</sup> |
|                              | 2018-2021      | 260.3 (114.5, 505.2) | 1.28    | 6.35  | 0.001 <sup>c</sup> |                   |         |                  |                     |
| S. aureus to gentamicin      | 2012-2021      | -0.1 (-0.8, 0.7)     | -0.0005 | -0.17 | 0.87               | -0.1 (-0.8, 0.7)  | -0.0005 | -0.17            | 0.87                |
| S. aureus to oxacillin       | 2012-2021      | -1.1 (-2.4, 0.2)     | -0.01   | -1.89 | 0.10               | -1.1 (-2.4, 0.2)  | -0.01   | -1.89            | 0.10                |

Abbreviations: APC, annual percentage change; AAPC, average annual percentage change; CI, confidence intervals; ESBL, extended-spectrum beta-lactamase; E. coli, Escherichia coli; GBS, Group B Streptococcus; E. spp., Enterococcus spp.; S. aureus, Staphylococcus aureus; NA, not available.

<sup>a</sup> If the AAPC is within one segment, the t-distribution is used. Otherwise, the normal (Z) distribution is used.

<sup>b</sup> Proportion of ESBL-negative E. coli strains.

<sup>c</sup> P < 0.05.
