# Supplementary material for: Trends in the antimicrobial susceptibility among Chinese neonates from 2012 to 2021: a multicenter study
Source: PubMed Central journal article supplement (PMC11290293; doi:10.1186/s13756-024-01440-2), 2024-07-30
Supplement: 13756_2024_1440_MOESM4_ESM.pdf [file 13756_2024_1440_MOESM4_ESM.pdf]

## Additional file 4

Table: Mantel-Haenszel linear-by-linear chi-square test for MIC of antibiotics against pathogens in Chinese full-term neonates with IBIs, 2019-2021

|                               | 2019        | 2020        | 2021        | Linear trend |       | Pearson-related |       |
|-------------------------------|-------------|-------------|-------------|--------------|-------|-----------------|-------|
| <i>E. coli</i> <sup>a</sup>   |             |             |             |              |       |                 |       |
| Ampicillin MIC (ug/ml), n (%) | n=17        | n=13        | n=12        | $\chi^2=$    | P=    | R=              | P=    |
|                               |             |             |             | 0.022        | 0.882 | -0.023          | 0.885 |
| ≤2                            | 1<br>(5.9)  | 1<br>(7.7)  | 1<br>(8.3)  |              |       |                 |       |
| 16                            | 7<br>(41.2) | 3<br>(23.1) | 5<br>(41.7) |              |       |                 |       |
| ≥32                           | 9<br>(52.9) | 9<br>(69.2) | 6<br>(50.0) |              |       |                 |       |
| Cefepime MIC (ug/ml), n (%)   | n=26        | n=20        | n=17        | $\chi^2=$    | P=    | R=              | P=    |
|                               |             |             |             | 0.004        | 0.948 | 0.008           | 0.949 |
| ≤0.12                         | 7<br>(26.9) | 7<br>(35.0) | 6<br>(35.3) |              |       |                 |       |
| 0.5                           | 7<br>(26.9) | 0<br>(0.0)  | 5<br>(29.4) |              |       |                 |       |
| 1                             | 3<br>(11.5) | 4<br>(20.0) | 0<br>(0.0)  |              |       |                 |       |
| 2                             | 4<br>(15.4) | 5<br>(25.0) | 0<br>(0.0)  |              |       |                 |       |
| 32                            | 4<br>(15.4) | 2<br>(10.0) | 5<br>(29.4) |              |       |                 |       |
| ≥64                           | 1<br>(3.8)  | 2<br>(10.0) | 1<br>(5.9)  |              |       |                 |       |
| Gentamicin MIC (ug/ml), n (%) | n=17        | n=15        | n=13        | $\chi^2=$    | P=    | R=              | P=    |
|                               |             |             |             | 0.335        | 0.563 | 0.087           | 0.569 |
| ≤1                            | 9<br>(52.9) | 6<br>(40.0) | 8<br>(61.5) |              |       |                 |       |
| 4                             | 5<br>(29.4) | 6<br>(40.0) | 1<br>(7.7)  |              |       |                 |       |
| 8                             | 2<br>(11.8) | 0<br>(0.0)  | 1<br>(7.7)  |              |       |                 |       |
| ≥16                           | 1<br>(5.9)  | 3<br>(20.0) | 3<br>(23.1) |              |       |                 |       |
| Cefotaxime MIC (ug/ml), n (%) | n=6         | n=4         | n=6         | $\chi^2=$    | P=    | R=              | P=    |
|                               |             |             |             | 0.000        | 1.000 | 0.000           | 1.000 |
| 0.5                           | 0<br>(0.0)  | 0<br>(0.0)  | 1<br>(16.7) |              |       |                 |       |
| 1                             | 2<br>(33.3) | 2<br>(50.0) | 0<br>(0.0)  |              |       |                 |       |

*Table: Mantel-Haenszel linear-by-linear chi-square test for MIC of antibiotics against pathogens in Chinese full-term neonates with IBIs, 2019-2021 (continued)*

|                                 | 2019   | 2020   | 2021   | Linear trend |                    | Pearson-related |                    |
|---------------------------------|--------|--------|--------|--------------|--------------------|-----------------|--------------------|
| <i>E. coli</i> <sup>a</sup>     |        |        |        |              |                    |                 |                    |
| Cefotaxime MIC (ug/ml), n (%)   | n=6    | n=4    | n=6    | $\chi^2=$    | P=                 | R=              | P=                 |
|                                 |        |        |        | 0.000        | 1.000              | 0.000           | 1.000              |
| >32                             | 4      | 2      | 5      |              |                    |                 |                    |
|                                 | (66.7) | (50.0) | (83.3) |              |                    |                 |                    |
| Ceftriaxone MIC (ug/ml), n (%)  | n=26   | n=20   | n=12   | $\chi^2=$    | P=                 | R=              | P=                 |
|                                 |        |        |        | 1.163        | 0.281              | 0.143           | 0.285              |
| ≤0.25                           | 7      | 7      | 2      |              |                    |                 |                    |
|                                 | (26.9) | (35.0) | (16.7) |              |                    |                 |                    |
| 0.5                             | 10     | 6      | 3      |              |                    |                 |                    |
|                                 | (38.5) | (30.0) | (25.0) |              |                    |                 |                    |
| 32                              | 4      | 1      | 3      |              |                    |                 |                    |
|                                 | (15.4) | (5.0)  | (25.0) |              |                    |                 |                    |
| ≥64                             | 5      | 6      | 4      |              |                    |                 |                    |
|                                 | (19.2) | (30.0) | (33.3) |              |                    |                 |                    |
| Meropenem MIC (ug/ml), n (%)    | n=7    | n=12   | n=13   | $\chi^2=$    | P=                 | R=              | P=                 |
|                                 |        |        |        | 1.656        | 0.198              | -0.231          | 0.203              |
| ≤0.25                           | 1      | 5      | 6      |              |                    |                 |                    |
|                                 | (14.3) | (41.7) | (46.2) |              |                    |                 |                    |
| 0.5                             | 6      | 7      | 7      |              |                    |                 |                    |
|                                 | (85.7) | (58.3) | (53.8) |              |                    |                 |                    |
| <i>GBS</i> <sup>a</sup>         |        |        |        |              |                    |                 |                    |
| Erythromycin MIC (ug/ml), n (%) | n=10   | n=6    | n=6    | $\chi^2=$    | P=                 | R=              | P=                 |
|                                 |        |        |        | 1.200        | 0.273              | -0.239          | 0.284              |
| ≤0.25                           | 4      | 4      | 4      |              |                    |                 |                    |
|                                 | (40.0) | (66.7) | (66.7) |              |                    |                 |                    |
| ≥0.5                            | 6      | 2      | 2      |              |                    |                 |                    |
|                                 | (60.0) | (33.3) | (33.3) |              |                    |                 |                    |
| Clindamycin MIC (ug/ml), n (%)  | n=12   | n=6    | n=4    | $\chi^2=$    | P=                 | R=              | P=                 |
|                                 |        |        |        | 5.815        | 0.016 <sup>b</sup> | -0.526          | 0.012 <sup>b</sup> |
| 0.125                           | 0      | 4      | 3      |              |                    |                 |                    |
|                                 | (0.0)  | (66.7) | (75.0) |              |                    |                 |                    |
| 0.25                            | 2      | 0      | 0      |              |                    |                 |                    |
|                                 | (16.7) | (0.0)  | (0.0)  |              |                    |                 |                    |
| 1                               | 4      | 0      | 0      |              |                    |                 |                    |
|                                 | (33.3) | (0.0)  | (0.0)  |              |                    |                 |                    |
| ≥8                              | 6      | 2      | 1      |              |                    |                 |                    |
|                                 | (50.0) | (33.3) | (25.0) |              |                    |                 |                    |

*Table: Mantel-Haenszel linear-by-linear chi-square test for MIC of antibiotics against pathogens in Chinese full-term neonates with IBIs, 2019-2021 (continued)*

|                               | 2019    | 2020    | 2021    | Linear trend |       | Pearson-related |       |
|-------------------------------|---------|---------|---------|--------------|-------|-----------------|-------|
| GBS <sup>a</sup>              |         |         |         |              |       |                 |       |
| Linezolid MIC (ug/ml), n (%)  | n=8     | n=6     | n=8     | $\chi^2=$    | P=    | R=              | P=    |
|                               |         |         |         | 1.203        | 0.273 | -0.239          | 0.283 |
| 1                             | 1       | 2       | 3       |              |       |                 |       |
|                               | (12.5)  | (33.3)  | (37.5)  |              |       |                 |       |
| 2                             | 7       | 4       | 5       |              |       |                 |       |
|                               | (87.5)  | (66.7)  | (62.5)  |              |       |                 |       |
| Vancomycin MIC (ug/ml), n (%) | n=7     | n=6     | n=8     | $\chi^2=$    | P=    | R=              | P=    |
|                               |         |         |         | 3.245        | 0.072 | -0.403          | 0.070 |
| ≤0.5                          | 5       | 6       | 8       |              |       |                 |       |
|                               | (71.4)  | (100.0) | (100.0) |              |       |                 |       |
| 1                             | 2       | 0       | 0       |              |       |                 |       |
|                               | (28.6)  | (0.0)   | (0.0)   |              |       |                 |       |
| E. Spp. <sup>a</sup>          |         |         |         |              |       |                 |       |
| Ampicillin MIC (ug/ml), n (%) | n=7     | n=8     | n=19    | $\chi^2=$    | P=    | R=              | P=    |
|                               |         |         |         | 0.142        | 0.706 | -0.066          | 0.712 |
| ≤2                            | 2       | 3       | 10      |              |       |                 |       |
|                               | (28.6)  | (37.5)  | (52.6)  |              |       |                 |       |
| 16                            | 3       | 1       | 1       |              |       |                 |       |
|                               | (42.9)  | (12.5)  | (5.3)   |              |       |                 |       |
| ≥32                           | 2       | 4       | 8       |              |       |                 |       |
|                               | (28.6)  | (50.0)  | (42.1)  |              |       |                 |       |
| Linezolid MIC (ug/ml), n (%)  | n=7     | n=8     | n=17    | $\chi^2=$    | P=    | R=              | P=    |
|                               |         |         |         | 0.557        | 0.456 | -0.134          | 0.465 |
| ≤1                            | 7       | 1       | 16      |              |       |                 |       |
|                               | (100.0) | (12.5)  | (94.1)  |              |       |                 |       |
| 2                             | 0       | 7       | 1       |              |       |                 |       |
|                               | (0.0)   | (87.5)  | (5.9)   |              |       |                 |       |
| Penicillin MIC (ug/ml), n (%) | n=7     | n=8     | n=19    | $\chi^2=$    | P=    | R=              | P=    |
|                               |         |         |         | 0.003        | 0.954 | -0.010          | 0.955 |
| 2                             | 2       | 2       | 6       |              |       |                 |       |
|                               | (28.6)  | (25.0)  | (31.6)  |              |       |                 |       |
| 4                             | 0       | 1       | 2       |              |       |                 |       |
|                               | (0.0)   | (12.5)  | (10.5)  |              |       |                 |       |
| 16                            | 2       | 1       | 2       |              |       |                 |       |
|                               | (28.6)  | (12.5)  | (10.5)  |              |       |                 |       |
| 32                            | 1       | 0       | 1       |              |       |                 |       |
|                               | (14.3)  | (0.0)   | (5.3)   |              |       |                 |       |
| ≥64                           | 2       | 4       | 8       |              |       |                 |       |
|                               | (28.6)  | (50.0)  | (42.1)  |              |       |                 |       |

*Table: Mantel-Haenszel linear-by-linear chi-square test for MIC of antibiotics against pathogens in Chinese full-term neonates with IBIs, 2019-2021 (continued)*

|                                                  | 2019          | 2020          | 2021          | Linear trend |                    | Pearson-related |                    |
|--------------------------------------------------|---------------|---------------|---------------|--------------|--------------------|-----------------|--------------------|
| <b>E. Spp. <sup>a</sup></b>                      |               |               |               |              |                    |                 |                    |
| High-concentration gentamicin MIC (ug/ml), n (%) | n=10          | n=8           | n=12          | $\chi^2=$    | P=                 | R=              | P=                 |
| ≤500                                             | 8<br>(80.0)   | 6<br>(75.0)   | 12<br>(100.0) | 1.966        | 0.161              | -0.260          | 0.165              |
| >500                                             | 2<br>(20.0)   | 2<br>(25.0)   | 0<br>(0.0)    |              |                    |                 |                    |
| Vancomycin MIC (ug/ml), n (%)                    | n=7           | n=8           | n=18          | $\chi^2=$    | P=                 | R=              | P=                 |
| ≤0.5                                             | 0<br>(0.0)    | 3<br>(37.5)   | 2<br>(11.1)   | 1.037        | 0.309              | -0.180          | 0.316              |
| 1                                                | 6<br>(85.7)   | 3<br>(37.5)   | 16<br>(88.9)  |              |                    |                 |                    |
| 2                                                | 1<br>(14.3)   | 2<br>(25.0)   | 0<br>(0.0)    |              |                    |                 |                    |
| <b>S. aureus <sup>a</sup></b>                    |               |               |               |              |                    |                 |                    |
| Clindamycin MIC (ug/ml), n (%)                   | n=12          | n=12          | n=10          | $\chi^2=$    | P=                 | R=              | P=                 |
| ≤0.25                                            | 11<br>(91.7)  | 10<br>(83.3)  | 9<br>(90.0)   | 0.024        | 0.878              | 0.027           | 0.881              |
| 0.5                                              | 1<br>(8.3)    | 2<br>(16.7)   | 1<br>(10.0)   |              |                    |                 |                    |
| Linezolid MIC (ug/ml), n (%)                     | n=12          | n=12          | n=10          | NA           | NA                 | NA              | NA                 |
| 2                                                | 12<br>(100.0) | 12<br>(100.0) | 10<br>(100.0) |              |                    |                 |                    |
| Vancomycin MIC (ug/ml), n (%)                    | n=10          | n=12          | n=12          | $\chi^2=$    | P=                 | R=              | P=                 |
| ≤0.5                                             | 3<br>(30.0)   | 5<br>(41.7)   | 9<br>(75.0)   | 4.435        | 0.035 <sup>b</sup> | -0.367          | 0.033 <sup>b</sup> |
| 1                                                | 7<br>(70.0)   | 7<br>(58.3)   | 3<br>(25.0)   |              |                    |                 |                    |
| Penicillin MIC (ug/ml), n (%)                    | n=12          | n=12          | n=10          | $\chi^2=$    | P=                 | R=              | P=                 |
| ≤0.12                                            | 2<br>(16.7)   | 4<br>(33.3)   | 5<br>(50.0)   | 4.547        | 0.033 <sup>b</sup> | -0.371          | 0.031 <sup>b</sup> |
| 0.25                                             | 1<br>(8.3)    | 2<br>(16.7)   | 2<br>(20.0)   |              |                    |                 |                    |
| 0.5                                              | 8<br>(66.7)   | 6<br>(50.0)   | 3<br>(30.0)   |              |                    |                 |                    |
| >8                                               | 1<br>(8.3)    | 0<br>(0.0)    | 0<br>(0.0)    |              |                    |                 |                    |

*Table: Mantel-Haenszel linear-by-linear chi-square test for MIC of antibiotics against pathogens in Chinese full-term neonates with IBIs, 2019-2021 (continued)*

|                               | 2019         | 2020          | 2021        | Linear trend |       | Pearson-related |       |
|-------------------------------|--------------|---------------|-------------|--------------|-------|-----------------|-------|
| <i>S. aureus</i> <sup>a</sup> |              |               |             |              |       |                 |       |
| Gentamicin MIC (ug/ml), n (%) | n=12         | n=12          | n=10        | $\chi^2=$    | P=    | R=              | P=    |
|                               |              |               |             | 0.011        | 0.916 | 0.018           | 0.918 |
| ≤0.5                          | 11<br>(91.7) | 12<br>(100.0) | 9<br>(90.0) |              |       |                 |       |
| 4                             | 1<br>(8.3)   | 0<br>(0.0)    | 1<br>(10.0) |              |       |                 |       |

Abbreviations: MIC, minimum inhibitory concentration; E. coli, Escherichia coli; GBS, Group B Streptococcus; E.spp., Enterococcus spp.; S. aureus, Staphylococcus aureus; NA, not available

<sup>a</sup> A small portion of strains did not have recorded MIC values for certain antibiotics, which were excluded from this analysis.

<sup>b</sup> P < 0.05.
